# Supplementary material
Source: Royal Society of Chemistry journal article supplement (doi:10.1039/d5py01170a)
Supplement: d5py01170a1.pdf [file d5py01170a1.pdf]

## Supporting Information

Zinc-based coordination exchange in epoxy networks cured via frontal polymerization

Christoph Schmidleitner<sup>1,2</sup>, Stefan Hirner<sup>1,2</sup>, Elisabeth Rossegger<sup>1,2\*</sup>

1 Polymer Competence Center Leoben GmbH, Sauraugasse 1, 8700 Leoben, Austria, elisabeth.rossegger@pccl.at

2 Graz University of Technology, Institute of Chemistry and Technology of Materials, Stremayrgasse 9, 8010 Graz, Austria

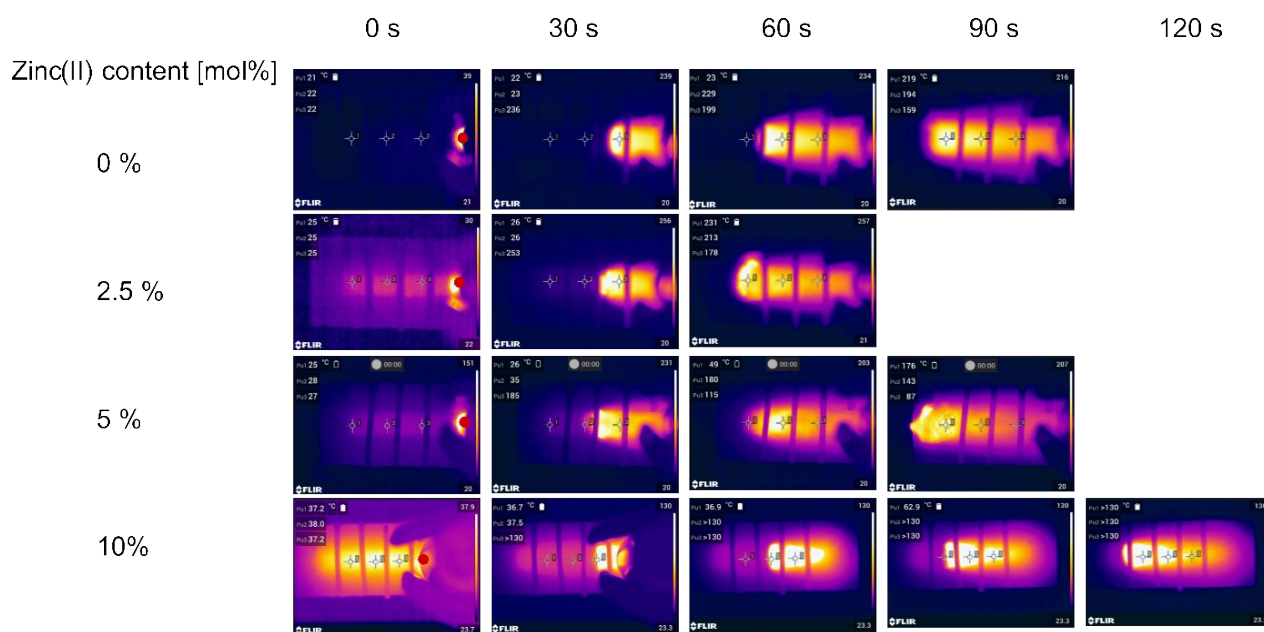

**Figure 1 SI** Thermal infrared images of the frontal polymerization of varying zinc contents at 0, 30, 60, 90 and 120 s, with a red dot indicates the irradiated spot

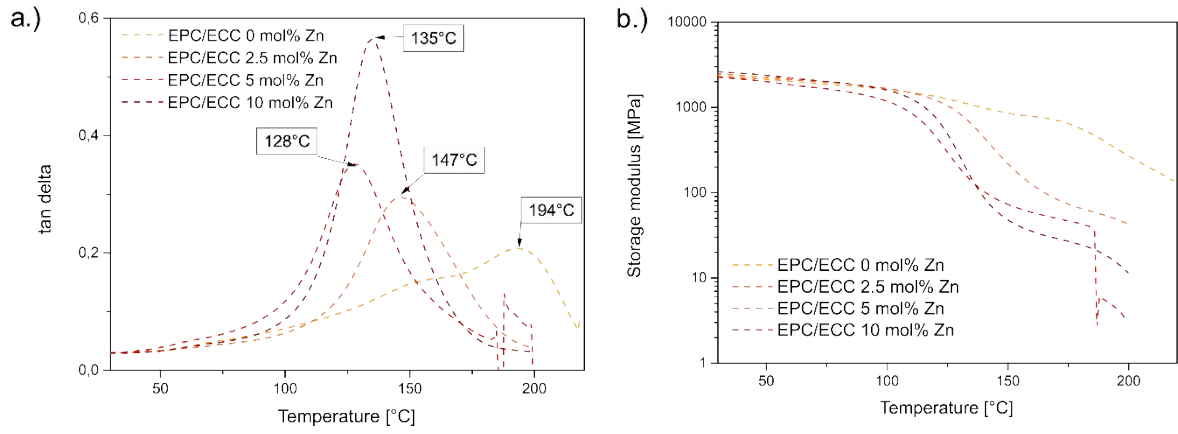

**Figure 2 SI** DMA measurements of samples with varying zinc content a.) tan delta and b.) storage modulus
